# Supplementary material for: Oxidative stress suppression in C. elegans by peptides from dogfish skin via regulation of transcription factors DAF-16 and HSF-1
Source: Royal Society of Chemistry journal article supplement (doi:10.1039/d1fo02271g), 2021-12-15
Supplement: d1fo02271g1.pdf [file d1fo02271g1.pdf]

## Supporting Information

**Table S1**

The experiment data for the yield of SDSP using Box-Behnken design.

| Run | Independent variables         |                       |                      | Responses            |
|-----|-------------------------------|-----------------------|----------------------|----------------------|
|     | A: Enzyme concentration (U/g) | B: Solid-liquid ratio | C: Reaction time (h) | Y: yield of SDSP (%) |
| 1   | 4000                          | 1:16                  | 5                    | 24.33                |
| 2   | 4000                          | 1:16                  | 5                    | 24.74                |
| 3   | 4000                          | 1:16                  | 5                    | 24.34                |
| 4   | 3000                          | 1:16                  | 6                    | 25.15                |
| 5   | 4000                          | 1:16                  | 5                    | 24.28                |
| 6   | 4000                          | 1:14                  | 6                    | 24.71                |
| 7   | 3000                          | 1:18                  | 5                    | 23.29                |
| 8   | 3000                          | 1:16                  | 4                    | 22.84                |
| 9   | 4000                          | 1:18                  | 6                    | 25.26                |
| 10  | 5000                          | 1:16                  | 4                    | 23.42                |
| 11  | 4000                          | 1:14                  | 4                    | 20.92                |
| 12  | 4000                          | 1:16                  | 5                    | 24.59                |
| 13  | 3000                          | 1:14                  | 5                    | 20.04                |
| 14  | 5000                          | 1:18                  | 5                    | 23.10                |
| 15  | 5000                          | 1:14                  | 5                    | 22.87                |
| 16  | 4000                          | 1:18                  | 4                    | 23.20                |
| 17  | 5000                          | 1:16                  | 6                    | 25.57                |

**Table S2**

Primer sequences for qRT-PCR.

| Gene            | Primer                                                                           |
|-----------------|----------------------------------------------------------------------------------|
| <i>daf-2</i>    | 5'-CGGTGCGAAGAGAGGATATT-3'<br>5'-TACAGAGGTCGCCGTTACTG-3'                         |
| <i>age-1</i>    | 5'-AGTGGATTCGGAAACAATGC-3'<br>5'-GGAATCGATGCACTTTCA-3'                           |
| <i>akt-1</i>    | 5'-TCACCGATGCGATTGTCT-3'<br>5'-AACTCCCCACCAATCAACAC-3'                           |
| <i>sir-2.1</i>  | 5'-TTCTTGTGTTGACTGGCGCT-3'<br>5'-GTCCTGGGAAGATTTCTCTCG-3'                        |
| <i>daf-16</i>   | 5'-CCAGACGGAAGGCTTAAACT-3'<br>5'-ATTTCGCATGAAACGAGAATG-3'                        |
| <i>skn-1</i>    | 5'-AGTGTCGGCGTTCCAGATTTC-3'<br>5'-GTCGACGAATTGCGAATCA-3'                         |
| <i>hsf-1</i>    | 5'-TTGACGACGACAAGCTTCCAGT-3'<br>5'-AAAGCTTGCACCAGAATCATCCC-3'                    |
| <i>act-1</i>    | 5'-CCAGGAATTGCTGATCGTATGCAGAA-3'<br>5'-TGGAGAGGAAGCGAGGATAGA -3'                 |
| <i>sod-3</i>    | 5'-CCAACCAGCGCTGAAATTCAATGG-3'<br>5'-GGAACCGAAGTCGCGCTTAATAGT-3'                 |
| <i>gsh-px</i>   | 5'- ATGGCACTTTGGCAGCTCA-3'<br>5'- ACGCGCAAAAAGTAGCAACGC-3'                       |
| <i>hsp-16.1</i> | 5'-GCAGAGGCTCTCCATCTGAA-3'<br>5'-GCTTGAAGTGGCAGACATTG-3'                         |
| <i>hsp-16.2</i> | 5'-TATGGCTCTGATGGAACG-3'<br>5'-GATTGATAGCGTACGACC-3'                             |
| <i>hsp-12.6</i> | 5'-ATGATGAGCGTTCAGTGATGGCTGACG-3'<br>5'-TTAATGCATTTTTCTTGCTTCAATGTGAAGAATTCC -3' |
| <i>gst-4</i>    | 5'- ATGCTCGTGCTCTTGCTGAG-3'<br>5'- GACTGACCGAATTGTTCTCCAT-3'                     |
| <i>gcs-1</i>    | 5'- GTCGATGAAGCCAGATGGTTGT-3'<br>5'- CGATCGTCGACACTTGCCTAA-3'                    |

**Table S3**

Statistical summary of the surface response analysis.

| Source         | Sum of Squares | Mean square | F value | p value  | Significance |
|----------------|----------------|-------------|---------|----------|--------------|
| Model          | 34.64          | 4.33        | 42.84   | < 0.0001 | ***          |
| A              | 1.66           | 1.66        | 16.43   | 0.0037   | **           |
| B              | 4.96           | 4.96        | 49.10   | 0.0001   | **           |
| C              | 13.27          | 13.27       | 131.29  | < 0.0001 | ***          |
| AB             | 2.28           | 2.28        | 22.59   | 0.0014   | **           |
| BC             | 0.75           | 0.75        | 7.41    | 0.0261   | *            |
| A <sup>2</sup> | 2.09           | 2.09        | 20.70   | 0.0019   | **           |
| B <sup>2</sup> | 8.55           | 8.55        | 84.59   | < 0.0001 | ***          |
| C <sup>2</sup> | 1.02           | 1.02        | 10.13   | 0.0129   | *            |
| Residual       | 0.81           | 0.10        |         |          |              |
| Lack of fit    | 0.65           | 0.16        | 4.08    | 0.101    |              |
| Pure error     | 0.16           | 0.04        |         |          |              |
| Cor total      | 35.45          |             |         |          |              |

\*  $p < 0.05$ ; \*\*  $p < 0.01$ ; \*\*\*  $p < 0.001$ .

**Fig. S1**

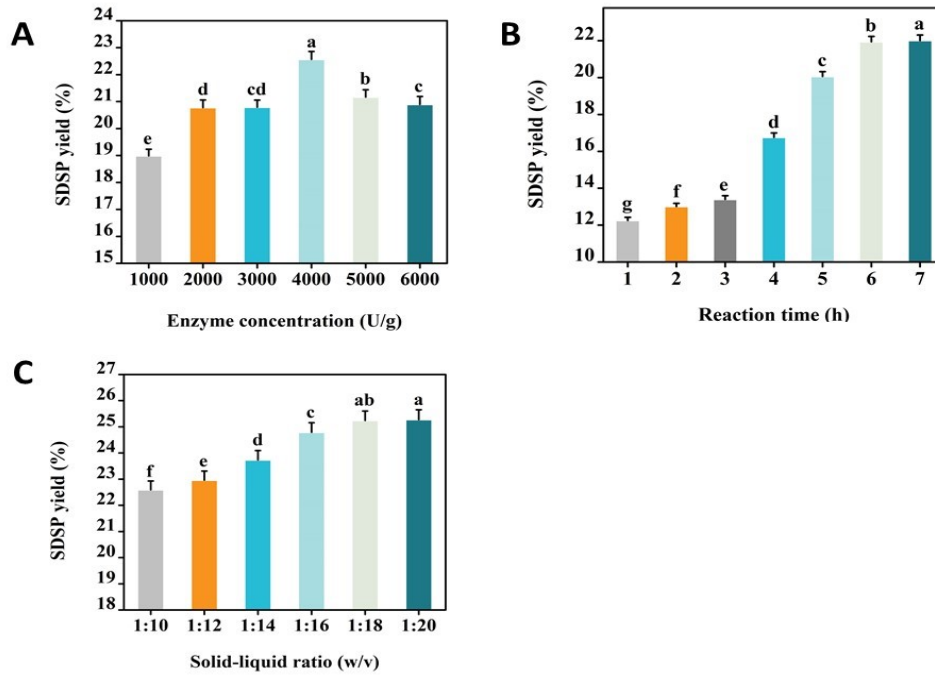

**Fig. S1.** Production of SDSP. **(A)** The effect of protease Sea-B-Zyme L200 concentrations on the yield of SDSP. Hydrolysis condition: 50 °C, reaction time 4 h, solid-liquid ratio 1:20. **(B)** The effect of reaction time on the yield of SDSP. Hydrolysis condition: 50 °C, protease concentration 4000 U/g, solid-liquid ratio 1:20. **(C)** The effect of solid-liquid ratio on the yield of SDSP. Hydrolysis condition: 50 °C, protease concentration 4000 U/g, reaction time 4 h. Relative values are depicted, and values are given as mean  $\pm$  SD. Plots are representative of three independent experiments. Different letters (a-g) means significant difference ( $p < 0.05$ ).

**Fig. S2**

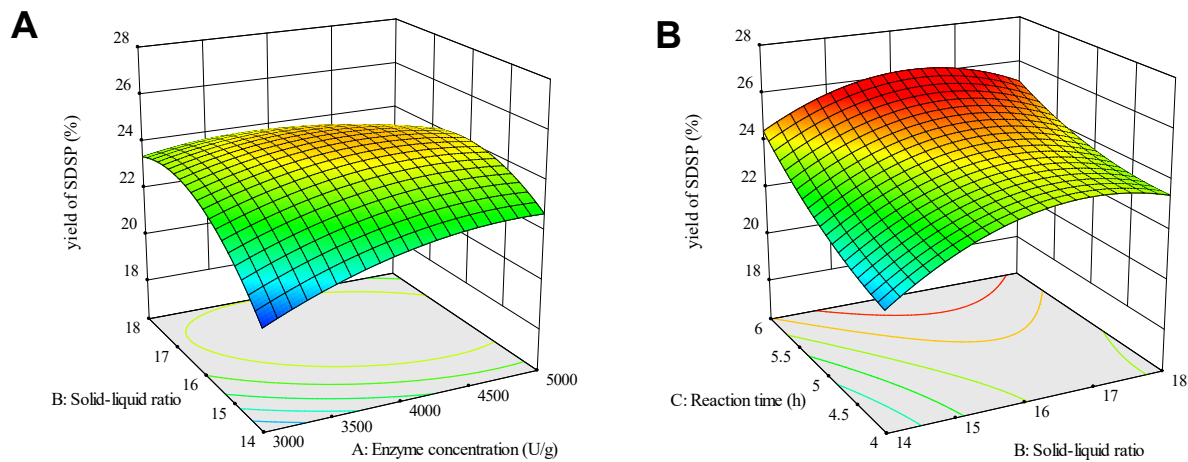

**Fig. S2.** Three-dimensional (3D) response surface plots. **(A)** Yield of SDSP (%) as a function of enzyme concentration (U/g)  $\times$  solid-liquid ratio. **(B)** Yield of SDSP (%) as a function of solid-liquid ratio  $\times$  reaction time (h).

**Fig. S3**

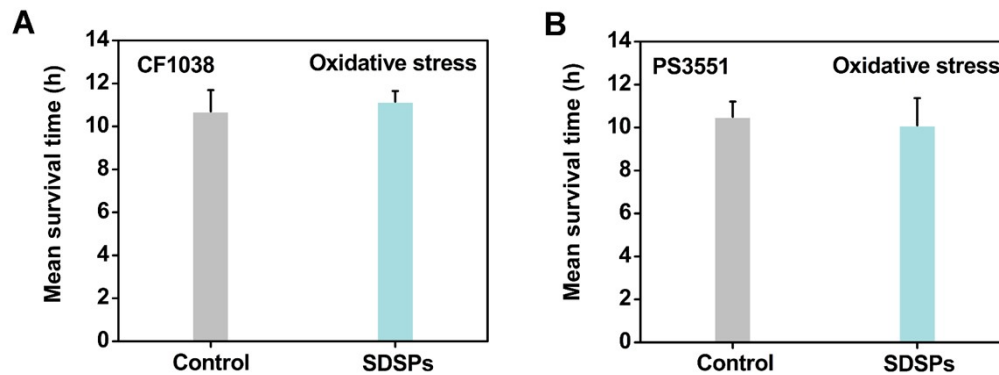

**Fig. S3.** Mean survival time (h) of *daf-16* and *hsf-1* mutants under oxidative stress. **(A)** Mean survival time of *daf-16* mutants under oxidative stress after SDSP<sub><2 kDa</sub> feeding for 48 h. **(B)** Mean survival time of *hsf-1* mutants under oxidative stress after SDSP<sub><2 kDa</sub> feeding for 48 h. (n = 60). Relative values are depicted, and values are given as mean  $\pm$  SD. Plots are representative of three independent experiments. *p* value was calculated using Student's t-test.

Fig. S4

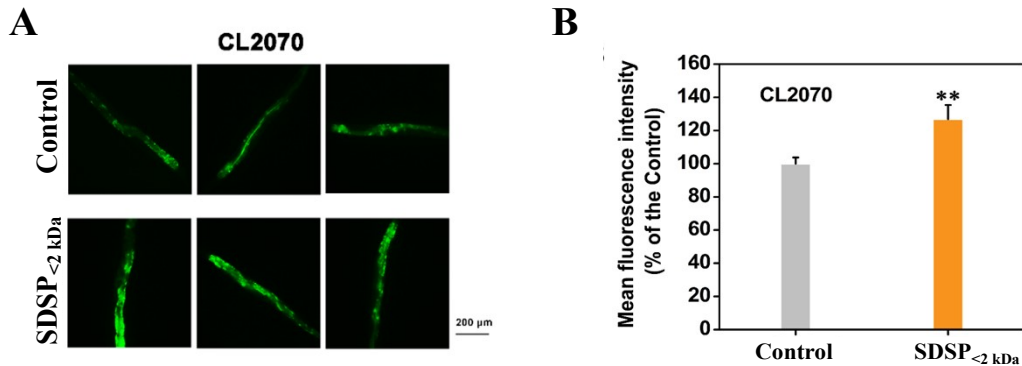

**Fig. S4.** (A) HSP-16.2 expression evaluated by fluorescence microscopy after SDS<sub><2 kDa</sub> feeding for 48 h. (n = 30). (B) Quantification of HSP-16.2 fluorescence intensity by Image J software. (n = 30). Relative values are depicted, and values are given as mean ± SD. Plots are representative of three independent experiments. *p* value was calculated using Student's *t*-test. *p* < 0.01 (\*\*). Method: L2 stage CL2070 nematodes were transferred to 30 μg/mL SDS<sub><2 kDa</sub>-treated and untreated plates for 2 days, and then collected and washed with M9 buffer and anesthetized with tetramisole hydrochloride on a 2% agarose pad. GFP (green fluorescent protein) expression in the nematode was examined using a DeltaVision deconvolution microscope (GE, Boston, MA).
